# Supplementary material for: NAMPT/SIRT1 Attenuate Ang II-Induced Vascular Remodeling and Vulnerability to Hypertension by Inhibiting the ROS/MAPK Pathway
Source: Hindawi journal article supplement (doi:10.1155/2020/1974265), 2020-12-30
Supplement: f3 [file 1974265.f3.pdf]

**A**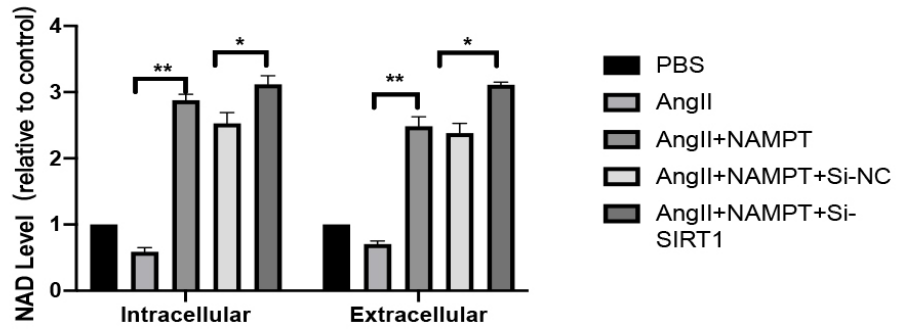**B**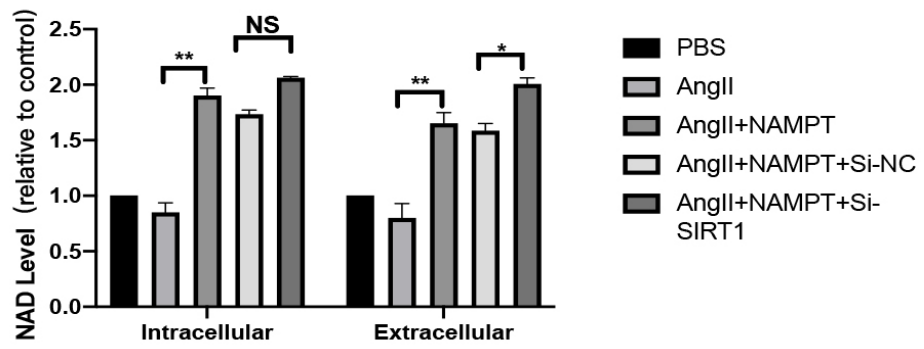**C**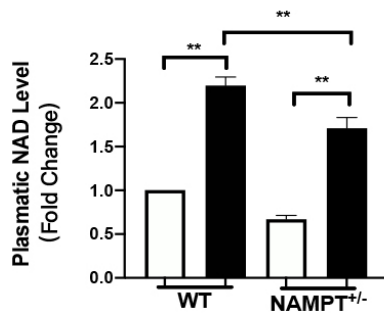**D**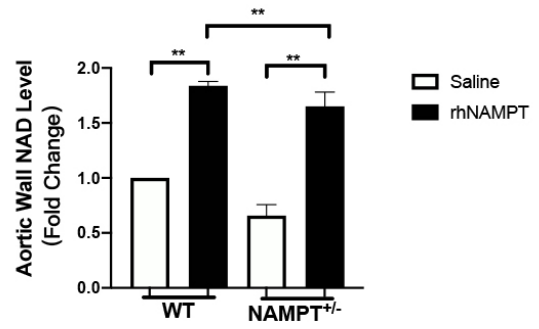**Figure S3**
