# Supplementary material for: NAMPT/SIRT1 Attenuate Ang II-Induced Vascular Remodeling and Vulnerability to Hypertension by Inhibiting the ROS/MAPK Pathway
Source: Oxid Med Cell Longev. 2020 Dec 30;2020:1974265. doi: 10.1155/2020/1974265 (PMC7791967; doi:10.1155/2020/1974265)
Supplement: Supplementary 4 — Table S1: the primer sequence for qRT-PCR. [file 1974265.f4.xlsx]

## Sheet: 工作表1
TableS1:The primer sequence for qRT-PCR
Gene	FORWARD (5′-3′)			REVERSE (5′-3′)
SIRT1	CCAGACCTCCCAGACCCTCAAG			GTGACACAGAGACGGCTGGAAC
SIRT2	TTCAAGCCAACCATCTGCCACTAC			AGCGTGTCTATGTTCTGCGTGTAG
SIRT3	GCTGCTTCTGCGGCTCTATACAC			CAAAGGTCCCGTGGGCTTCAAC
SIRT4	GCCTCAATTCTCCTCTCACCAACC			GCCGCTGACTCCCTGCTTTG
SIRT5	GTGTACCTCGTGTGGCACTGTTG			GGATTCTGGCGTCTTGAGTCTCTG
SIRT6	GGACCCTGCGTGCTAGACAAAG			GGGCTGTTGGGCTTGGACTTATAC
SIRT7	TAAGCGAAGCGGAGCCTACCC			GAGCCCATCACAGTTCTGAGACAC
CTGF	AGTCGTCCGCTTCCGCTACC			AGGGTGAGGTCCTTGCCTACTTG
CollagenI	GAGGGTGGTGCTGTGACAATGAC			GGGTGGCATTTCCTGAGAGAAGC
CollagenIII	ACCATGCGGAAGCCAAGATGTG			AGGGTCCAGGTCAGGTGTGTAAC
NAMPT	CGCCACCACAGCCAACTATGAC			CTGCTTGCCCAGGAAGACGAAG
GAPDH	CATCACTGCCACCCAGAAGACTG			ATGCCAGTGAGCTTCCCGTTCAG
NAMPT:Nicotinamide phosphoribosyltransferase;CTGF:Connective tissue growth factor
