# Supplementary material for: NAMPT/SIRT1 Attenuate Ang II-Induced Vascular Remodeling and Vulnerability to Hypertension by Inhibiting the ROS/MAPK Pathway
Source: Oxid Med Cell Longev. 2020 Dec 30;2020:1974265. doi: 10.1155/2020/1974265 (PMC7791967; doi:10.1155/2020/1974265)
Supplement: Supplementary 5 — Table S2: the SBP, MAP, and DBP of WT and NAMPT+/- mouse after Ang II infusion. [file 1974265.f5.xlsx]

## Sheet: 工作表1
Table S2. The SBP,MAP,DBP of WT and NAMPT+/- mouse after AngII infusion
Variables	Sham		AngII
	WT	NAMPT+/-	WT	NAMPT+/-
SBP（mmHg）
0w	92.41±3.13	91.23+2.16	92.38±3.12	94.81±1.78
1w	95.45±2.17	94.29±3.29	118.25±3.75	120.39±2.69
2w	94.27±1.36	93.27±2.59	131.16±2.18	139.46±3.29
3w	95.24±3.19	94.37±3.17	148.35±2.56	163.34±2.89**
4w	96.34±2.16	94.25±1.38	160.18±1.24	176.34±1.48**
MAP（mmHg）
0w	82.12±2.14	80.37±2.45	83.24±3.12	80.46±1.37
1w	82.17±2.16	83.49±1.46	101.24±2.39	108.26±2.34
2w	85.34±2.59	88.24±2.16	110.08±0.56	121.47±1.35
3w	86.24±2.34	87.34±1.34	120.23±1.34	135.48±3.14**
4w	85.68±1.39	88.23±2.46	133.24±2.35	152.35±2.47**
DBP（mmHg）
0w	72.23±2.15	70.24±3.89	73.28±2.47	71.34±4.35
1w	73.35±1.34	72.49±2.36	86.34±3.24	98.24±2.34
2w	74.25±3.27	75.12±2.14	110.35±2.78	112.34±2.47
3w	74.27±2.39	72.15±2.17	120.34±1.68	128.24±1.35*
4w	73.24±2.34	75.23±4.24	128.35±1.34	140.34±1.45**
HR（bpm）
0w	370.34±5.28	378.24±4.79	382.35±3.45	385.24±5.89
1w	382.84±4.35	385.35±3.67	402.12±4.79	410.38±4.32
2w	387.34±3.28	386.34±4.57	417.28±4.28	428.35±2.38*
3w	390.35±4.28	389.45±3.58	428.35±5.76	440.58±4.89**
4w	387.47±4.57	391.37±5.64	441.35±7.45	460.34±6.87**
SBP:Systolic Blood pressure. DBP:Diastolic Blood pressure MAP：mean arterial pressure.Values are means ± SEM for 6-8 mice in each group. One-way ANOVA followed by post-hoc Tukey’s test. *P < 0.05 WT(AngII)vs NAMPT+/- (AngII)mice
