# Supplementary material for: NAMPT/SIRT1 Attenuate Ang II-Induced Vascular Remodeling and Vulnerability to Hypertension by Inhibiting the ROS/MAPK Pathway
Source: Oxid Med Cell Longev. 2020 Dec 30;2020:1974265. doi: 10.1155/2020/1974265 (PMC7791967; doi:10.1155/2020/1974265)
Supplement: Supplementary 6 — Table S3: the SBP, MAP, and DBP of WT and NAMPT+/- mouse after rhNAMPT and Ang II infusion. [file 1974265.f6.xlsx]

## Sheet: 工作表1
Table S3. The SBP,MAP,DBP of WT and NAMPT+/- mouse after rhNAMPT and AngII infusion
Variables	WT		NAMPT+/-
	Saline	rhNAMPT	Saline	rhNAMPT
SBP（mmHg）
0w	91.48±10.26	91.13±3.38	93.61±1.65	94.86±1.65
1w	118.25±3.75	117.25±3.17	118.39±2.53	121.45±2.46
2w	130.26±2.20	128.28±2.28	139.35±3.16	135.35±2.45
3w	147.28±2.24	145.28±2.39*	158.34±2.48	150.27±2.50**
4w	160.20±1.48	155.34±1.14**	175.58±1.48	165.25±1.35**
MAP（mmHg）
0w	82.35±4.24	83.36±3.28	81.36±1.25	83.46±1.25
1w	104.15±2.39	105.27±1.36	108.25±2.49	105.36±2.17
2w	116.13±1.35	114.08±1.36	121.36±1.28	115.45±1.25
3w	124.24±1.46	122.17±1.26	134.39±3.35	125.36±3.24**
4w	135.17±1.35	132.25±1.28*	148.35±2.28	143.35±2.38**
DBP（mmHg）
0w	74.18±2.28	74.38±3.25	72.46±3.26	73.43±4.29
1w	87.43±4.24	90.57±3.26	95.14±2.36	83.35±1.47
2w	109.43±3.24	108.25±1.65	112.25±1.57	112.44±1.36
3w	122.45±2.43	122.28±1.43	128.35±0.78	126.15±2.45
4w	134.28±1.28	132.25±1.34	140.27±1.28	139.42±1.28
HR（bpm）
0w	378.24±3.58	379.46±3.68	380.37±5.48	382.38±4.64
1w	401.47±3.57	408.22±3.89	409.26±4.65	410.37±4.45
2w	414.32±4.16	417.57±3.56	418.56±2.56	418.28±2.87
3w	425.28±3.76	429.29±3.28	430.45±3.28	435.24±2.35
4w	440.28±4.38	439.47±5.48	448.28±5.48	436.27±5.78
SBP:Systolic Blood pressure. DBP:Diastolic Blood pressure MAP：mean arterial pressure.Values are means ± SEM for 6-8 mice in each group. One-way ANOVA followed by post-hoc Tukey’s test.*P < 0.05 WT(rhNAMPT)vs NAMPT+/-(rhNAMPT) mice
